# Supplementary material
Source: PubMed Central journal article supplement (PMC7608022)
Supplement: mmc1.pdf [file mmc1.pdf]

**Cell Reports, Volume 33**

**Supplemental Information**

**HSV-1 and Zika Virus but Not SARS-CoV-2**

**Replicate in the Human Cornea and Are**

**Restricted by Corneal Type III Interferon**

**Jonathan J. Miner, Derek J. Platt, Cyrus M. Ghaznavi, Pallavi Chandra, Andrea Santeford, Amber M. Menos, Zhenyu Dong, Erin R. Wang, Wei Qian, Elysse S. Karozichian, Jennifer A. Philips, and Rajendra S. Apte**

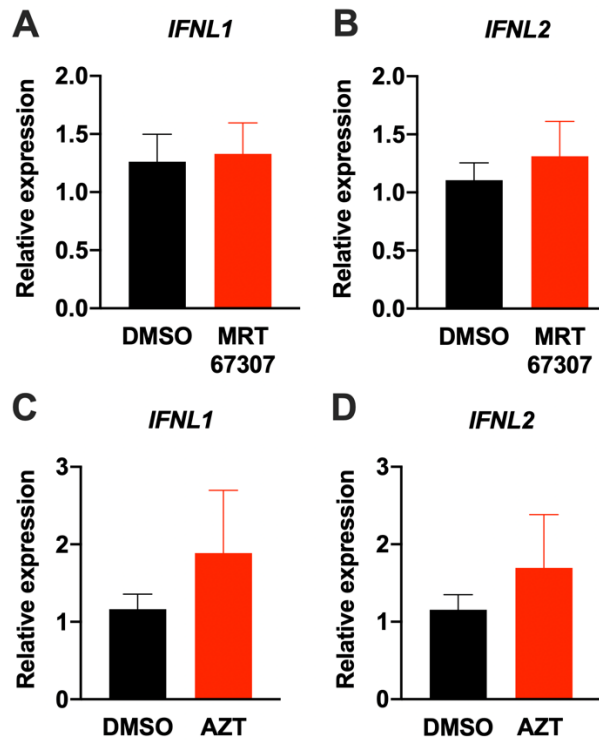

**Figure S1. Treatment with inhibitors of TBK1 or reverse transcriptase does not impact expression of *IFNL1* or *IFNL2* in the human cornea. Related to Figure 3. (A-D)** Human donor corneas were treated with TBK1 inhibitor (MRT 67307), an anti-retroviral drug (AZT), or DMSO vehicle control for 6 hours, and then *IFNL1* and *IFNL2* mRNA expression was quantitated by qRT-PCR. Data represent the mean  $\pm$  SEM of human donor corneas ( $n = 3$ ) with 4 cornea segments per condition pooled from 2 independent experiments. Results were analyzed by Mann-Whitney test.
